# Supplementary material for: Investigation of micro- and nanoscale barrier layer capacitance mechanisms of conductivity in CaCu3Ti4O12via scanning probe microscopy technique
Source: Royal Society of Chemistry journal article supplement (doi:10.1039/c7ra06385g), 2017-01-01
Supplement: c7ra06385g1.pdf [file c7ra06385g1.pdf]

## ELECTRONIC SUPPLEMENTARY INFORMATION

### Investigation of micro- and nanoscale barrier layer capacitance mechanisms of conductivity in $\text{CaCu}_3\text{Ti}_4\text{O}_{12}$ via Scanning Probe Microscopy technique

*M. S. Ivanov<sup>1\*</sup>, F. Amaral<sup>2,3\*</sup>, V. A. Khomchenko<sup>1</sup>, J. A. Paixão<sup>1</sup> and L. C. Costa<sup>3</sup>*

<sup>1</sup>CFisUC, Department of Physics, University of Coimbra, 3004-516 Coimbra, Portugal

<sup>2</sup>College of Health Technology of Coimbra, Polytechnic Institute of Coimbra, 3040-162,  
Coimbra, Portugal

<sup>3</sup>I3N and Physics Department University of Aveiro, 3810-193 Aveiro, Portugal

#### ***Authors Information***

\*Corresponding authors:

Dr. M. S. Ivanov

CFisUC, Department of Physics, University of Coimbra, P-3004-516 Coimbra, Portugal

E-mail: [maxim.ivanov@uc.pt](mailto:maxim.ivanov@uc.pt)

Dr. F. Amaral

College of Health Technology of Coimbra, Polytechnic Institute of Coimbra, 3040-162,  
Coimbra, Portugal

E-mail: [filipe.amaral@estescoimbra.pt](mailto:filipe.amaral@estescoimbra.pt)

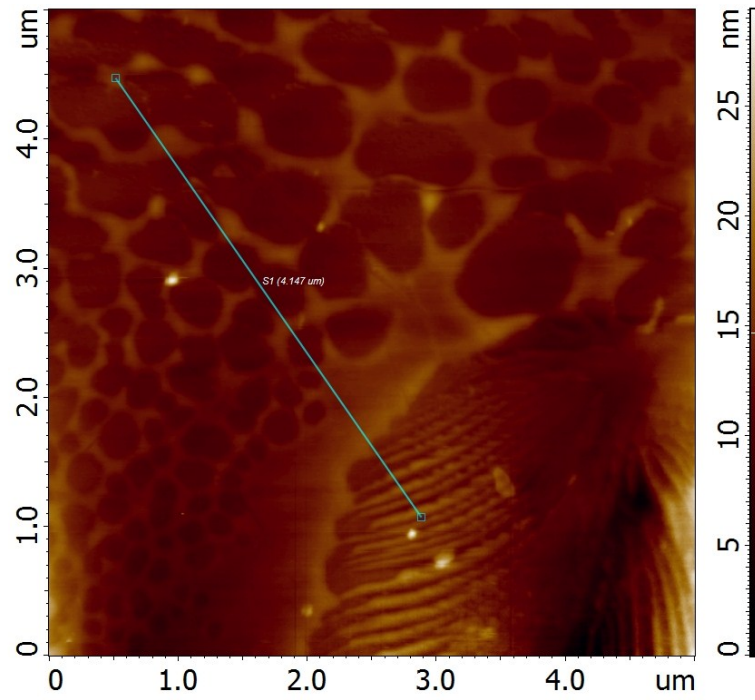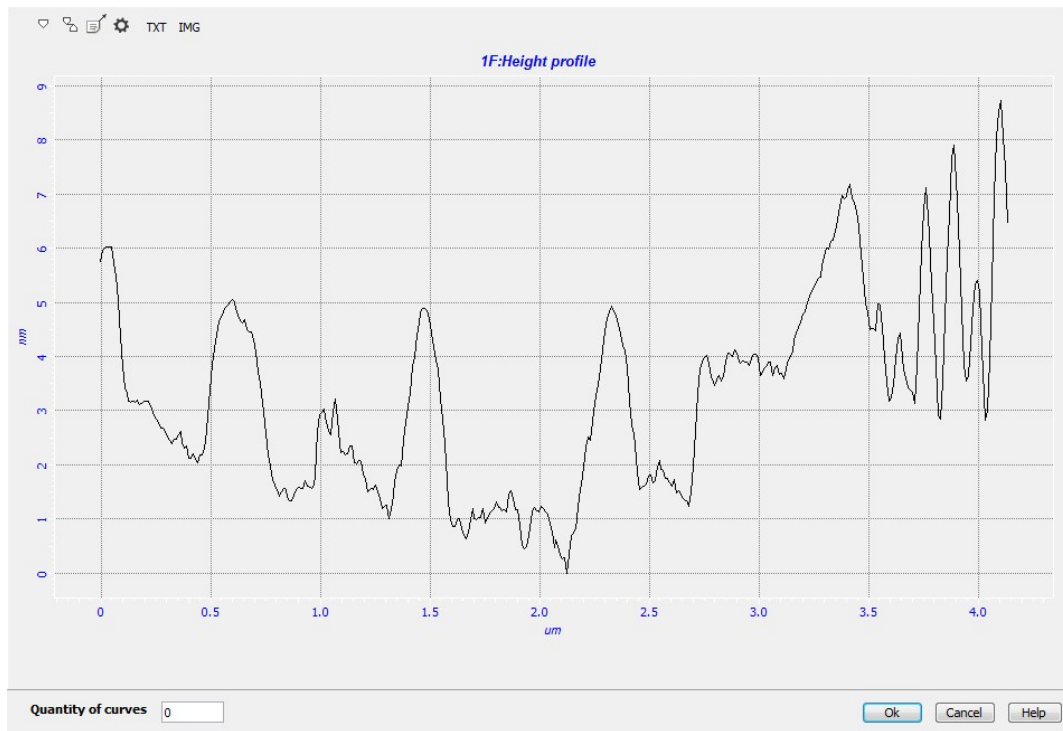

**Figure 1.** Surface topography of mechanically-polished CCTO sample and typical cross-section indicating the RMS roughness of around 5 nm.

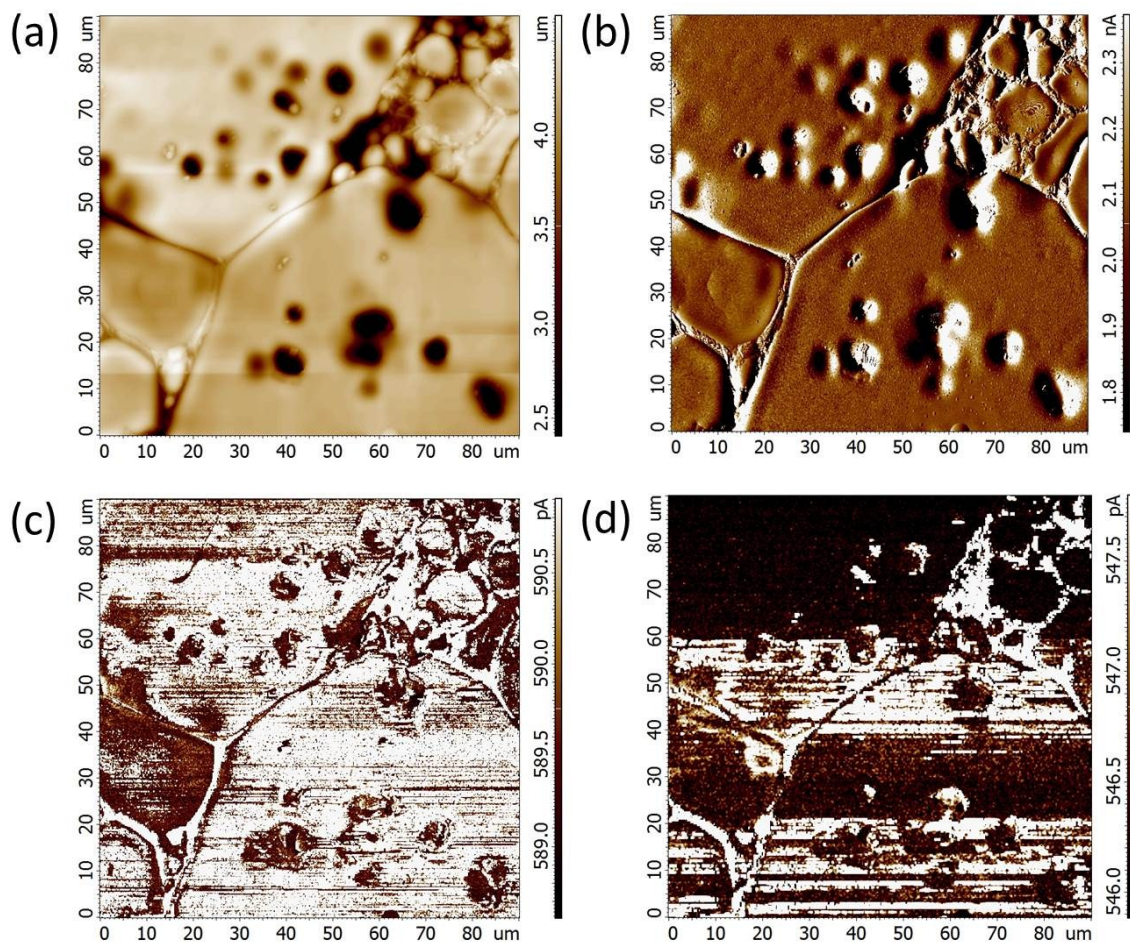

**Figure 2.** Topography (a), DFL response (b) and corresponding SR signal decay due to the degradation of the Pt/Ir coating: new tip (c), the same tip after 3 hours cycling at 0.1 Hz (512 x 512 pixels) (d).



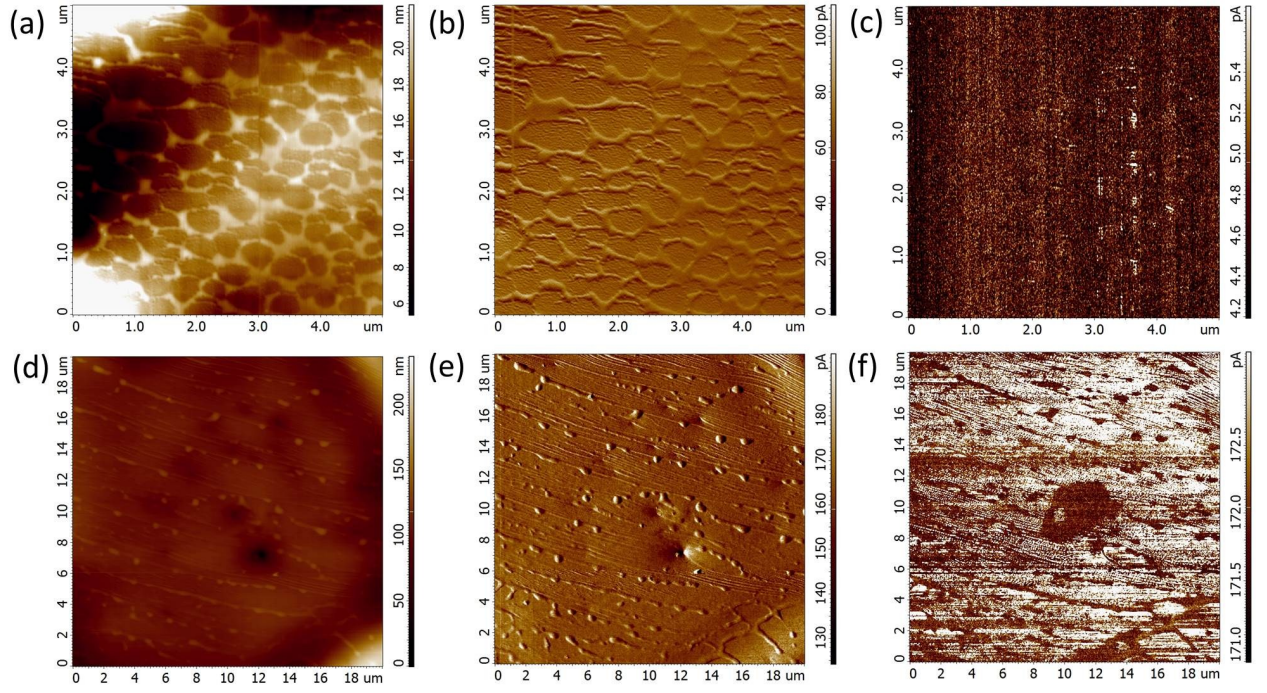

**Figure 3.** A comparison of the topographies (a, d), DFL responses (b, e) and corresponding current distributions (c, f) characteristic of the bump (upper part) and terrace-ledge (bottom part) domain structures (the notation is taken from Ref. 1).

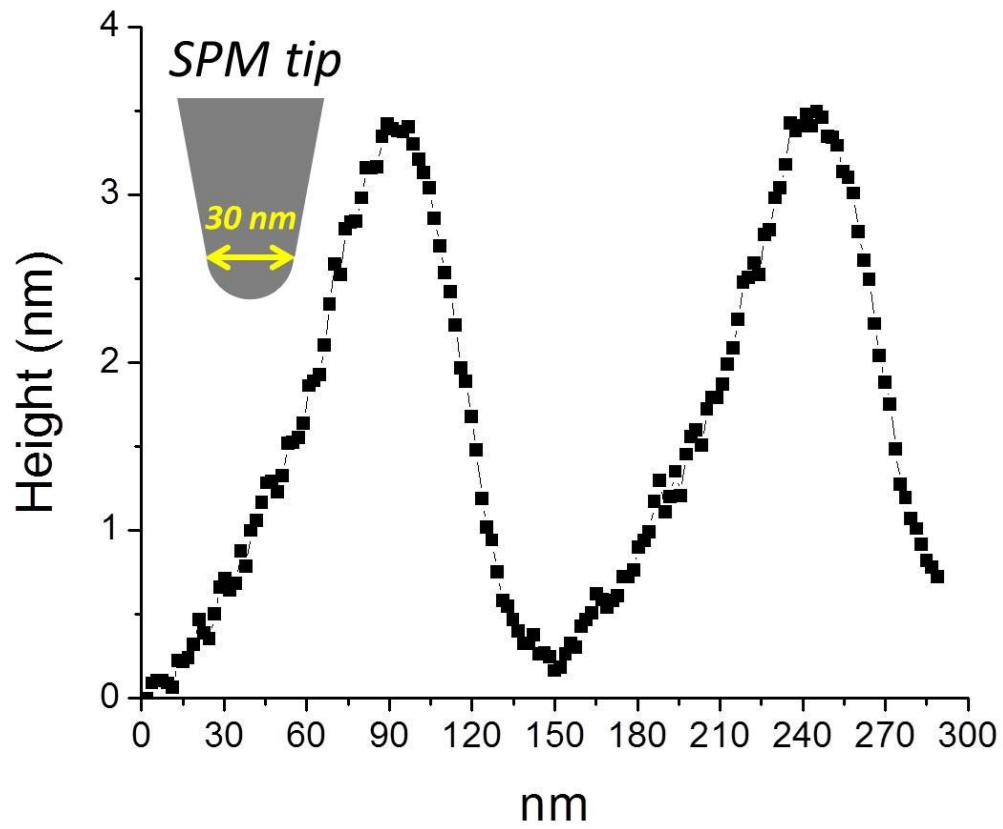

**Figure 4.** The size relation between the apex of the SPM probe and the typical roughness of the CCTO sample (the profile of terrace ledge 2 domain topography is presented).

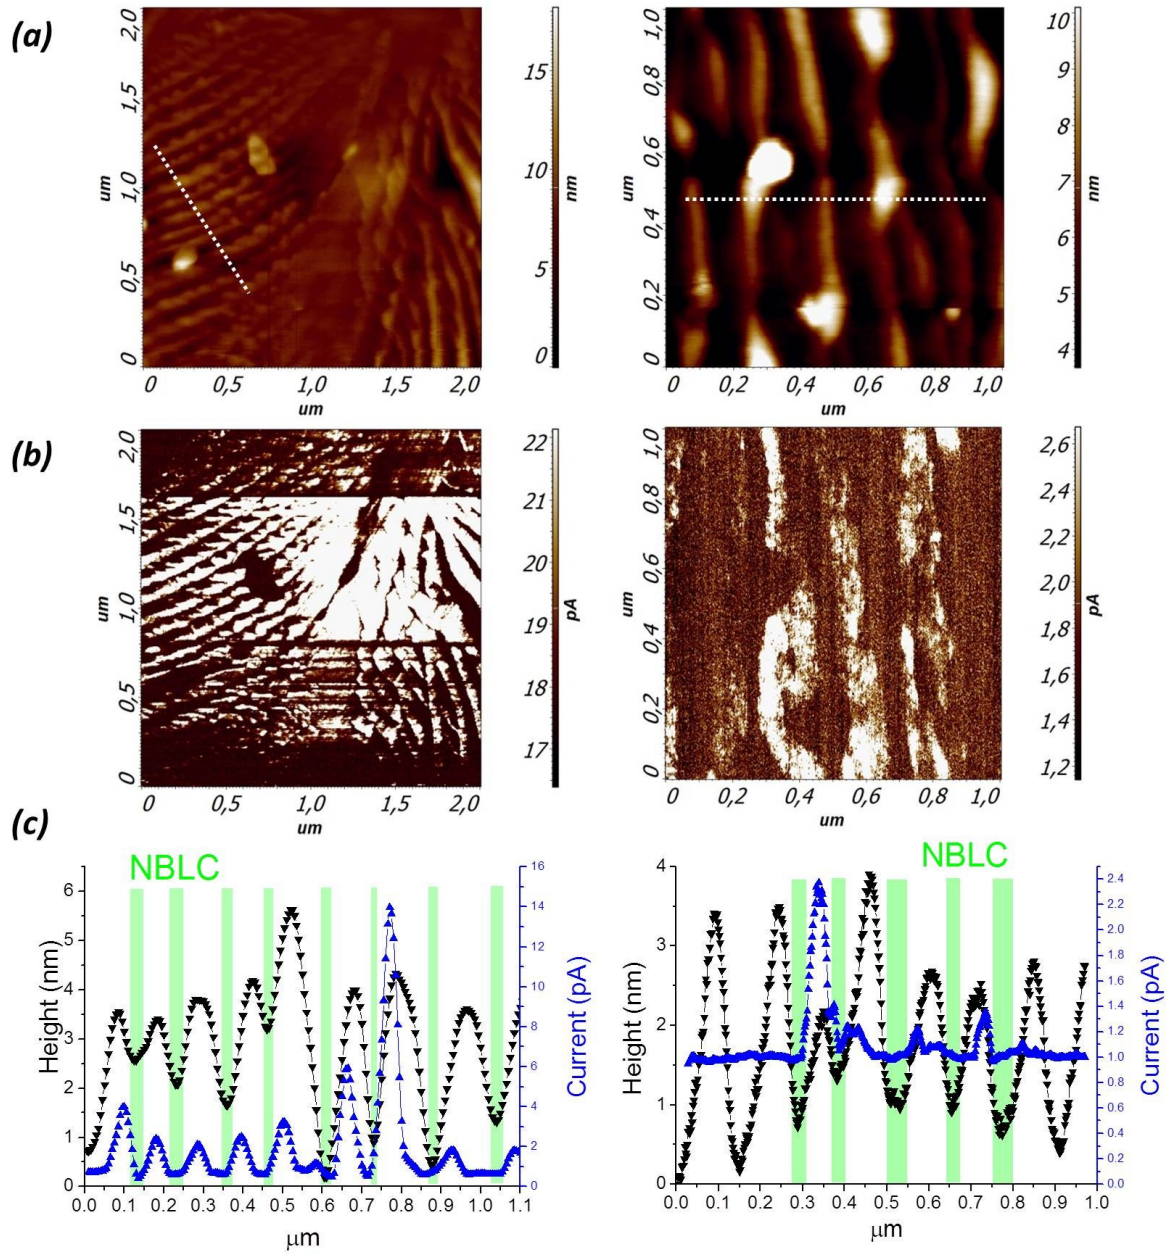

**Figure 5.** Topography (a), corresponding current distribution (b) and their profiles (c) obtained for the terrace ledge 1 (left) and terrace ledge 2 (right) domain areas.



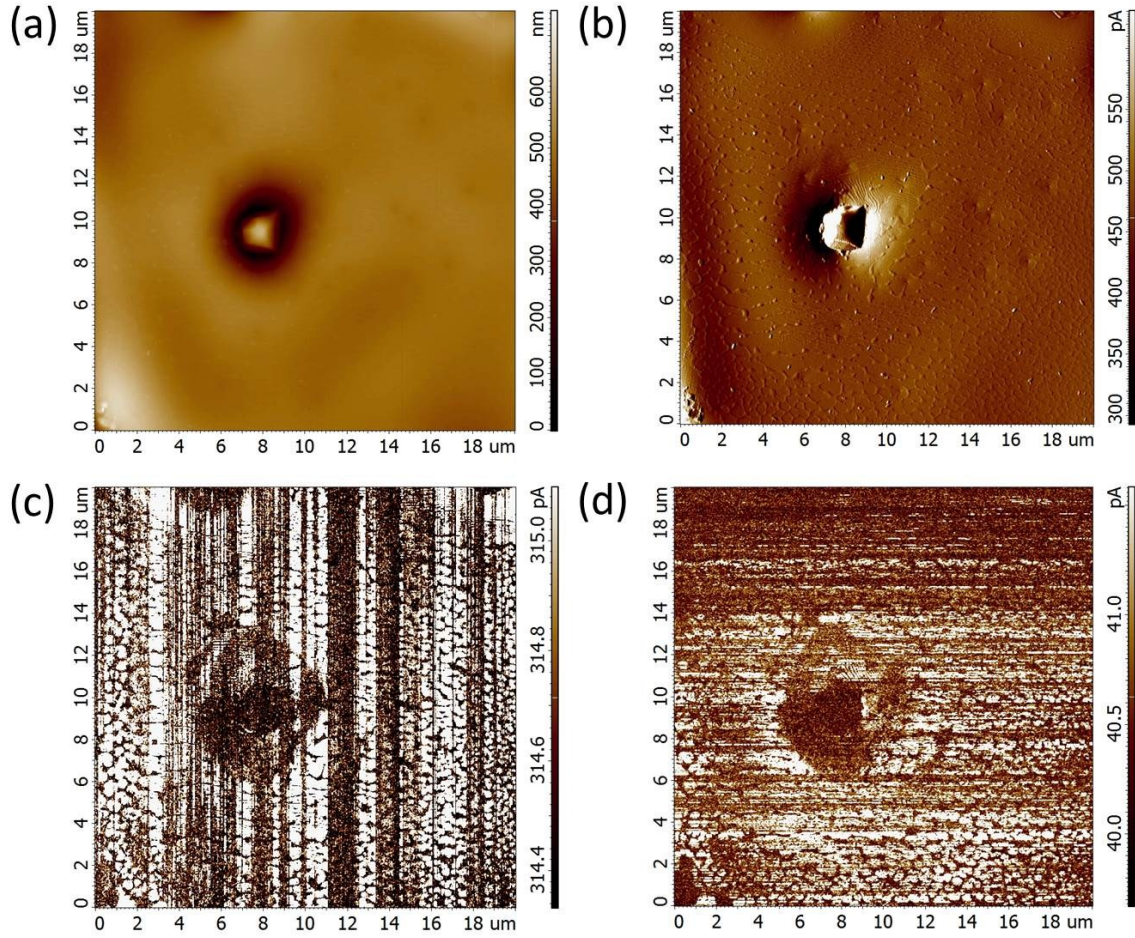

**Figure 6.** Topography (a), DFL response (b) and corresponding top-to-down (c) and left-to-right (d) SR scans. The scan was done at 0.3 Hz (512 x 512 pixels) and dc bias voltage of 1 V.

## References

1. T. Fang and H.-K. Shiao, Mechanism for Developing the Boundary Barrier Layers of  $\text{CaCu}_3\text{Ti}_4\text{O}_{12}$ , J. Am. Ceram. Soc. 87 (2004) 2072-2079.
